# Supplementary material for: New Palladium(II) Complexes Containing Methyl Gallate and Octyl Gallate: Effect against Mycobacterium tuberculosis and Campylobacter jejuni
Source: MDPI journal article supplement (doi:10.3390/molecules28093887), 2023-05-05

Figure S1.  $^1\text{H}$  NMR spectrum of octyl gallate (og).

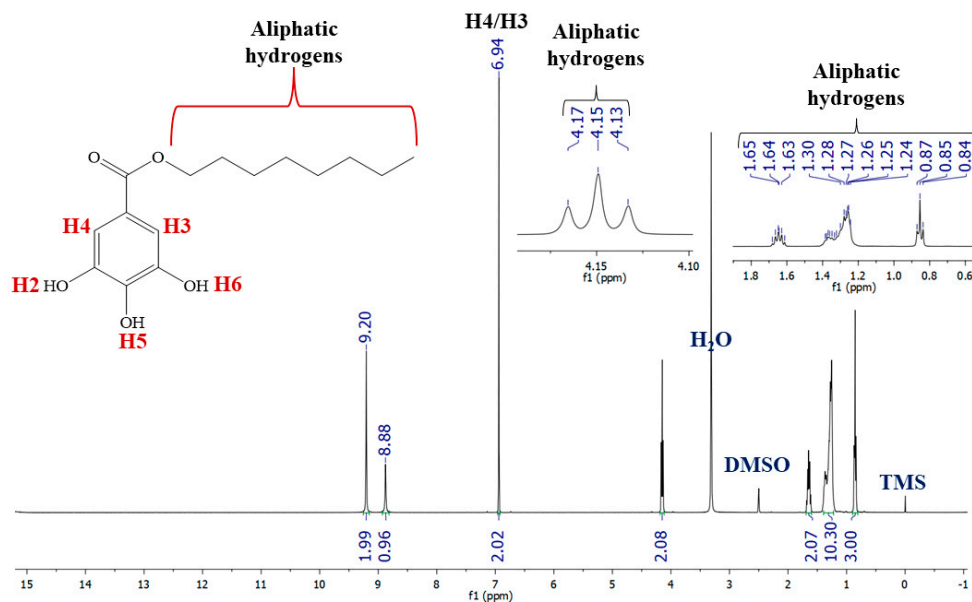

Figure S2.  $^1\text{H}$  NMR spectrum of  $[\text{Pd}(\text{meg})(1,10\text{-phen})]$  1.

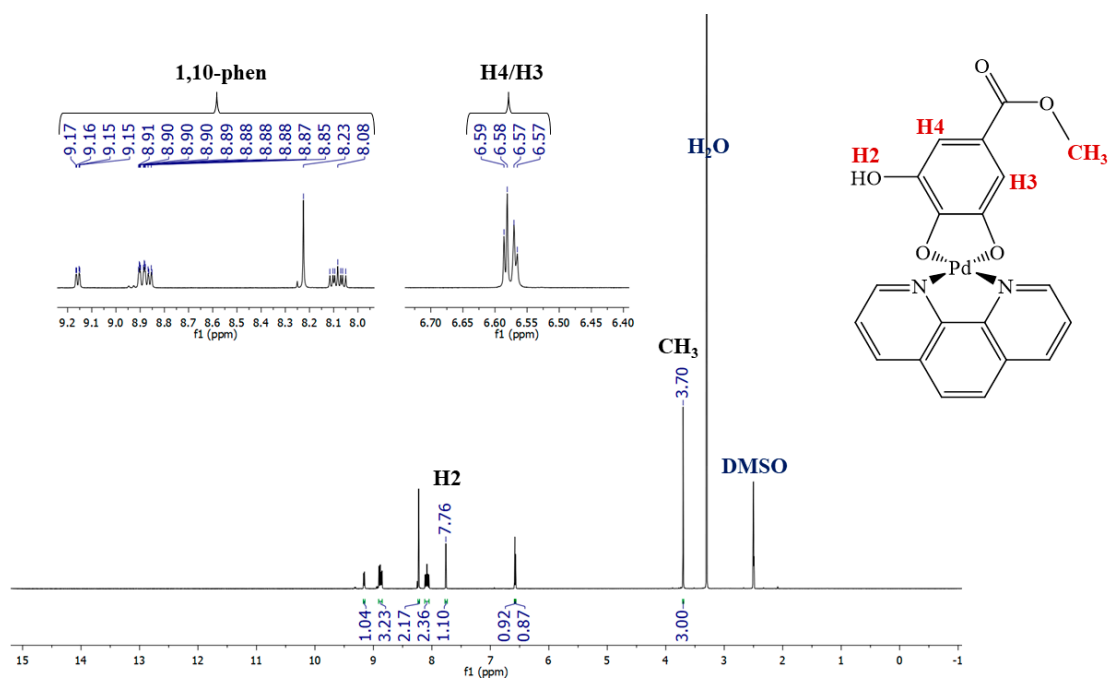

Figure S3.  $^1\text{H}$  NMR spectrum of  $[\text{Pd}(\text{og})(1,10\text{-phen})]$  3.

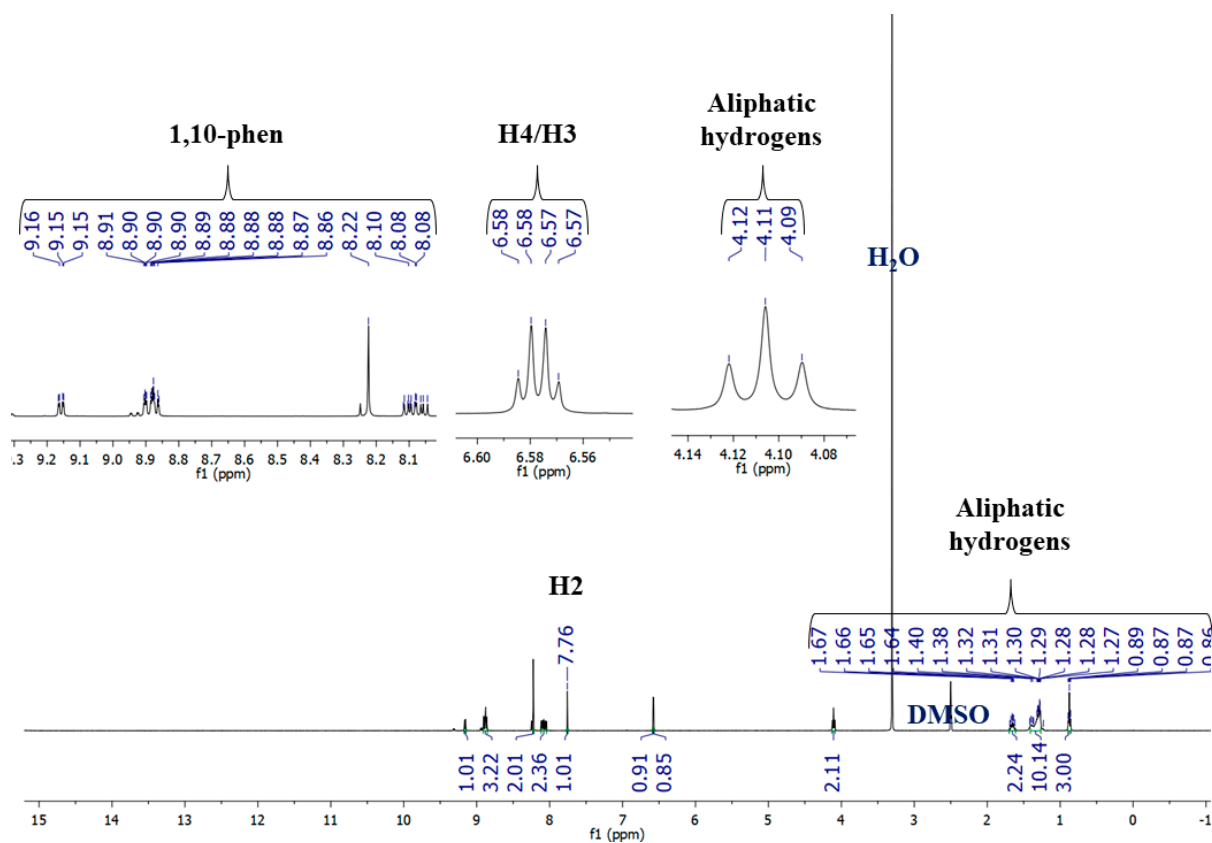

Figure S4.  $^1\text{H}$  NMR spectrum of  $[\text{Pd}(\text{og})(\text{PPh}_3)_2]$  4.

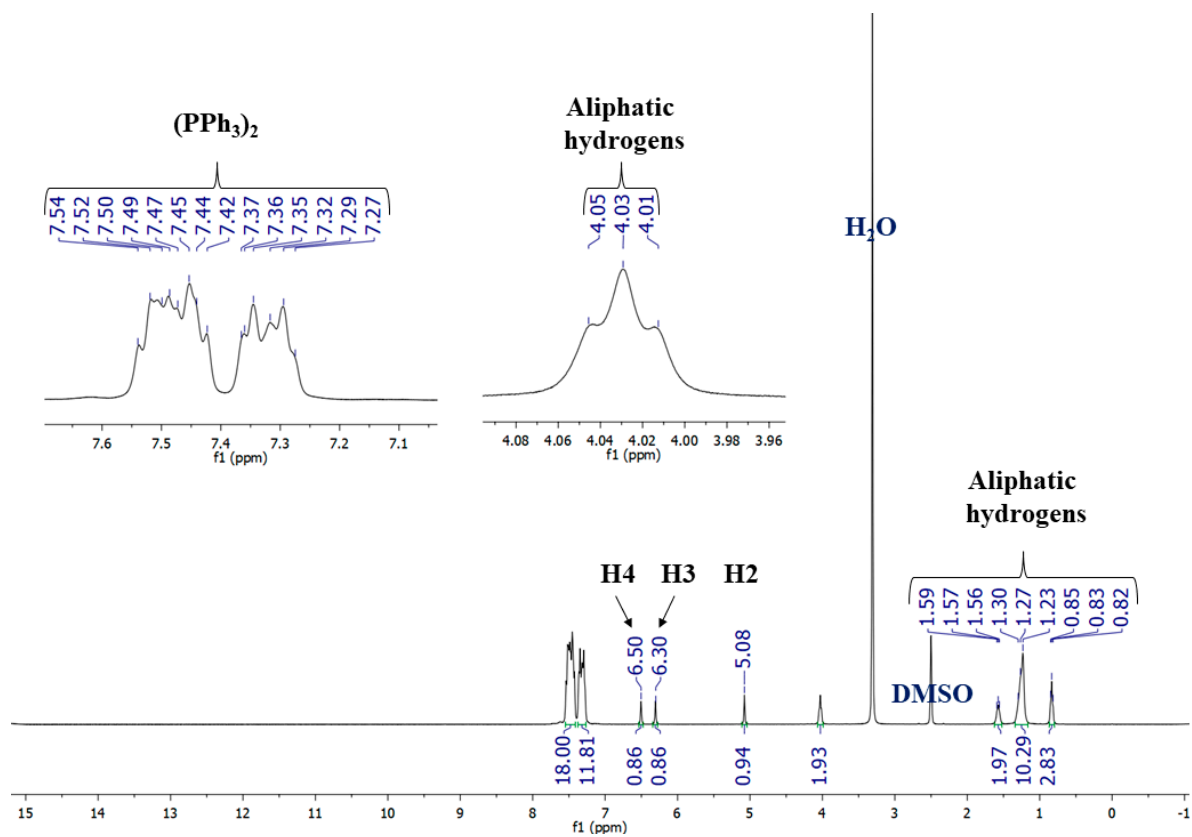

Figure S5.  $^{13}\text{C}$   $\{^1\text{H}\}$  NMR spectrum of methyl gallate (meg).

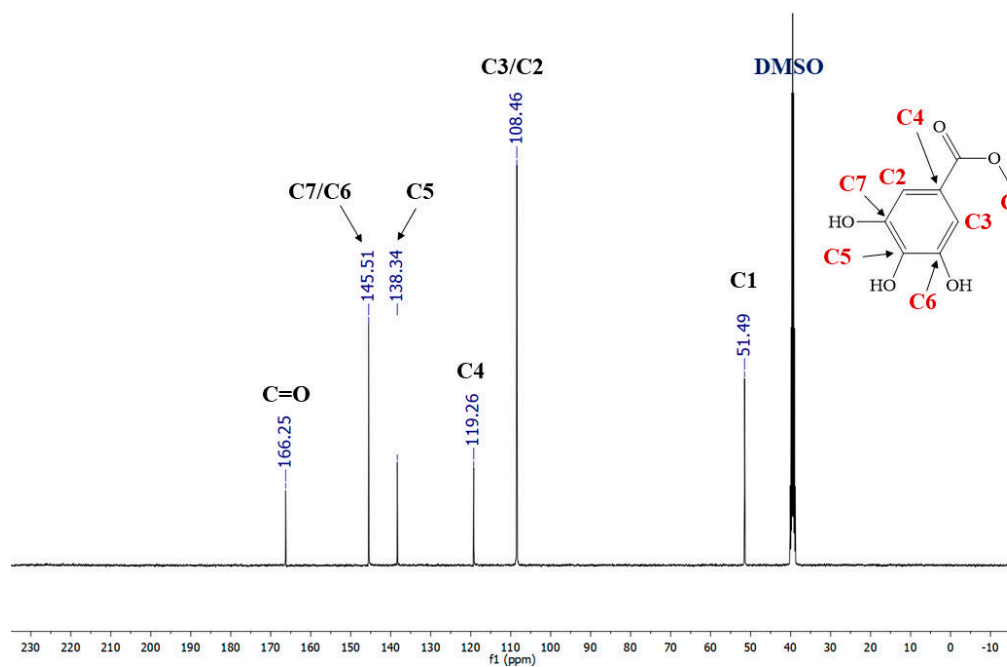

Figure S6.  $^{13}\text{C}$   $\{^1\text{H}\}$  NMR spectrum of octyl gallate (og).

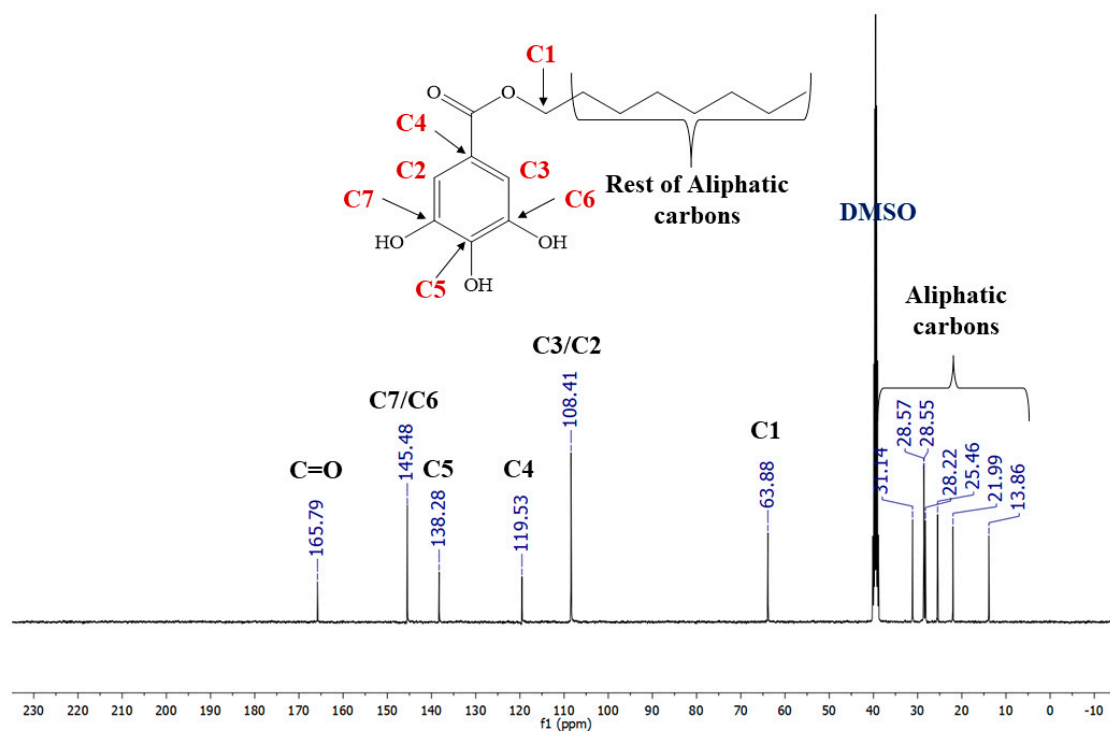

Figure S7.  $^{13}\text{C}$   $\{^1\text{H}\}$  NMR spectrum of  $[\text{Pd}(\text{meg})(1,10\text{-phen})]$  **1**.

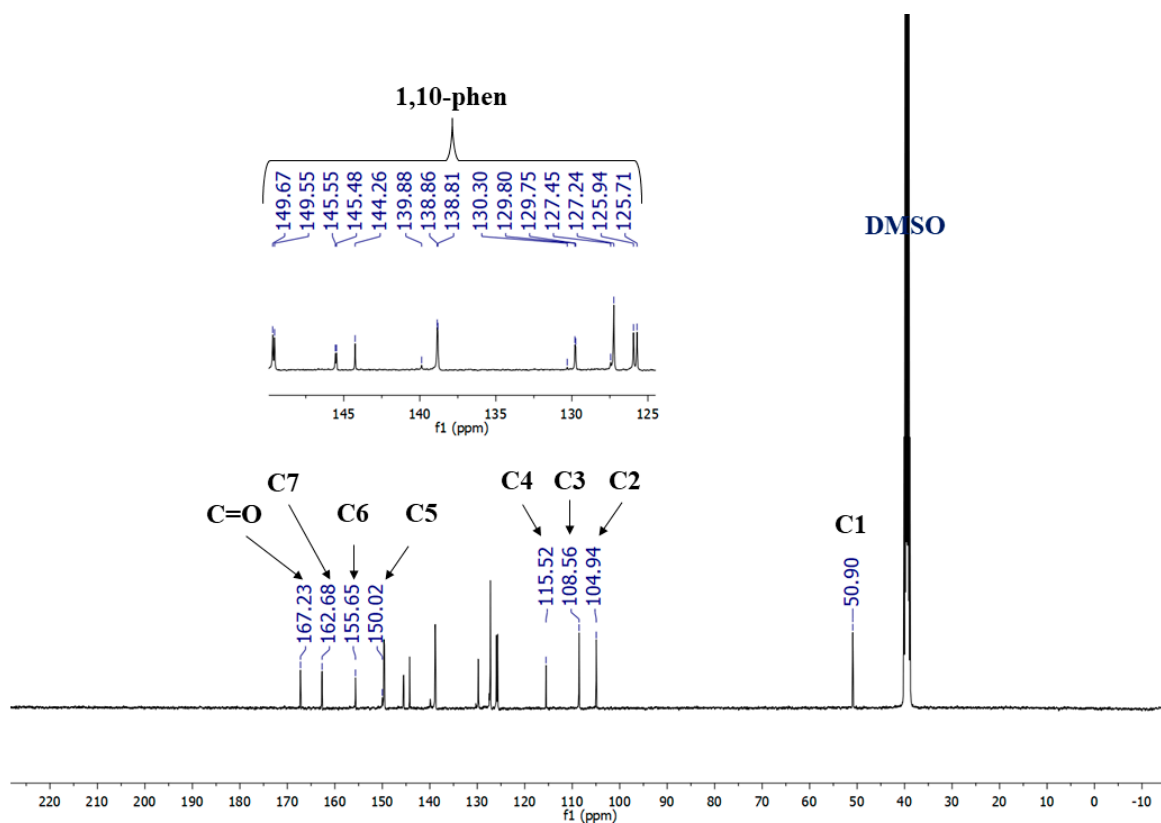

Figure S8.  $^{13}\text{C}$   $\{^1\text{H}\}$  NMR spectrum of  $[\text{Pd}(\text{meg})(\text{PPh}_3)_2]$  **2**.

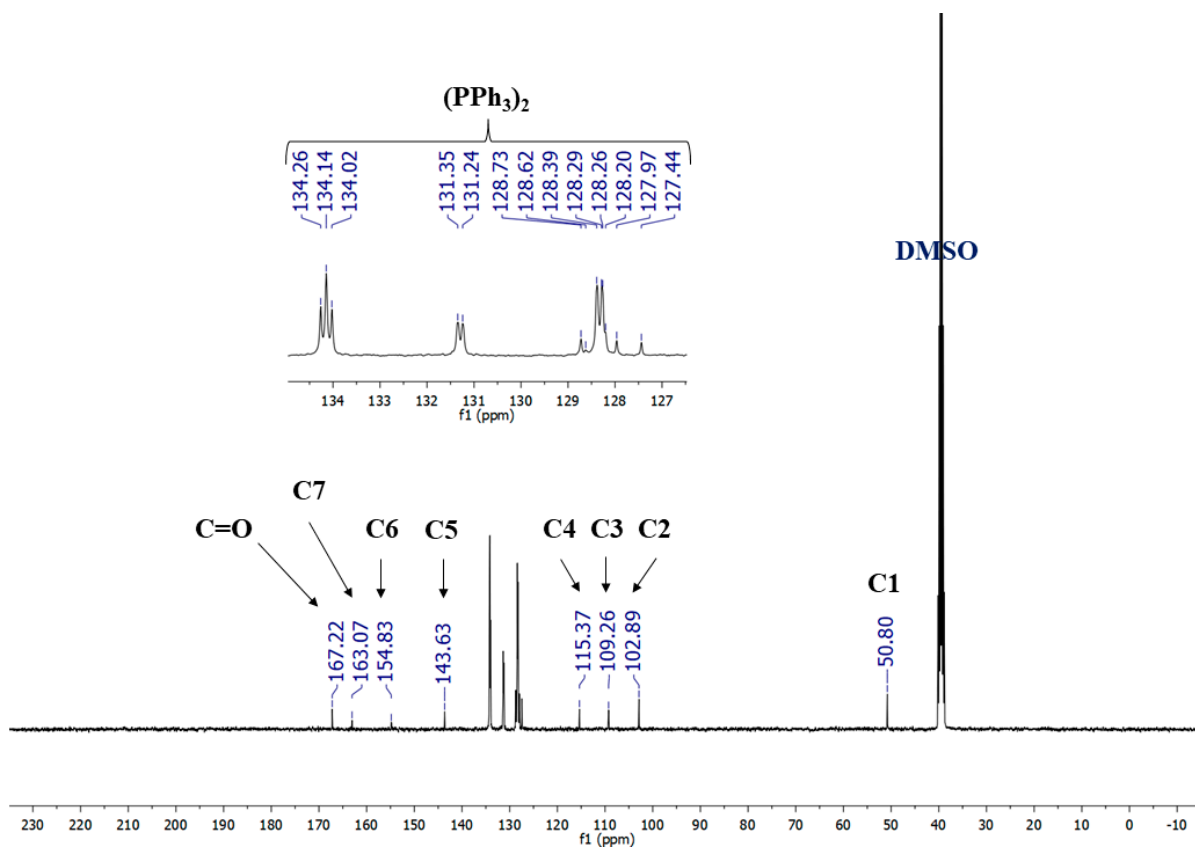

Figure S9.  $^{13}\text{C}$   $\{^1\text{H}\}$  NMR spectrum of  $[\text{Pd}(\text{og})(1,10\text{-phen})]$  **3**.

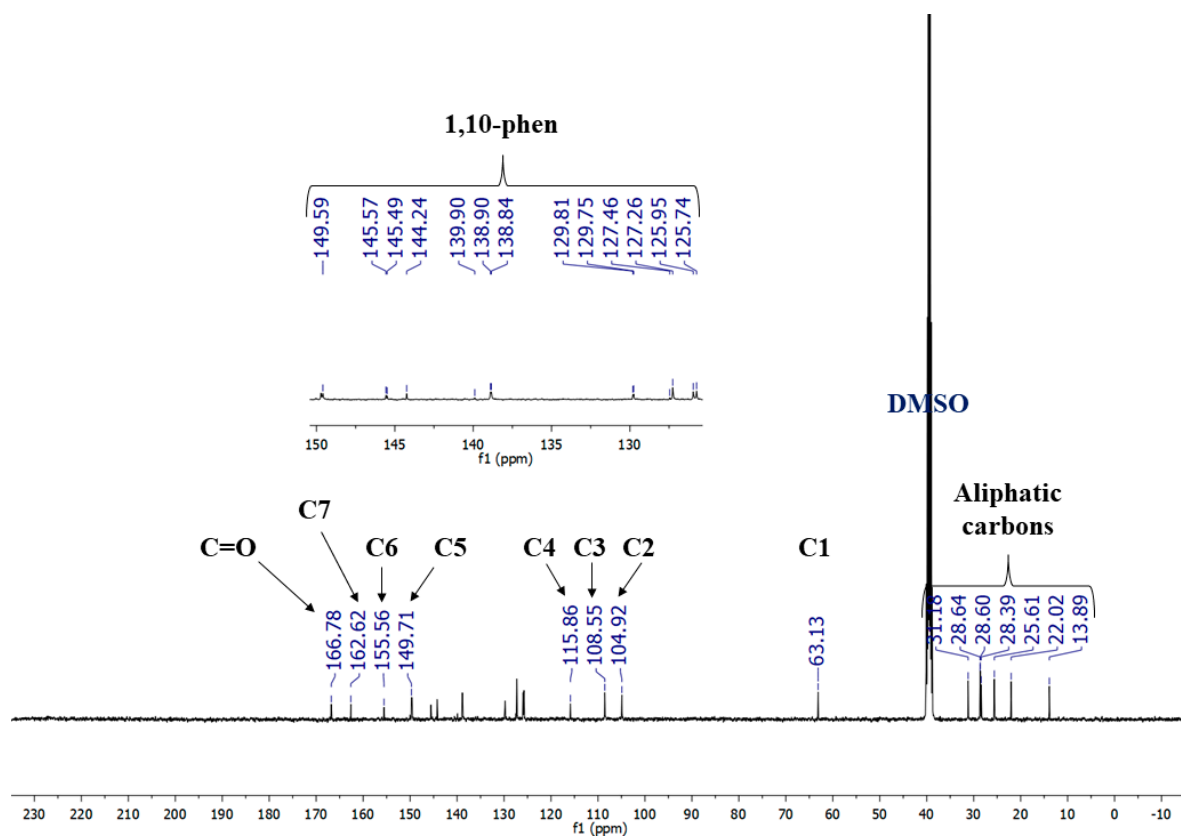

Figure S10.  $^{13}\text{C}$   $\{^1\text{H}\}$  NMR spectrum of  $[\text{Pd}(\text{og})(\text{PPh}_3)_2]$  **4**.

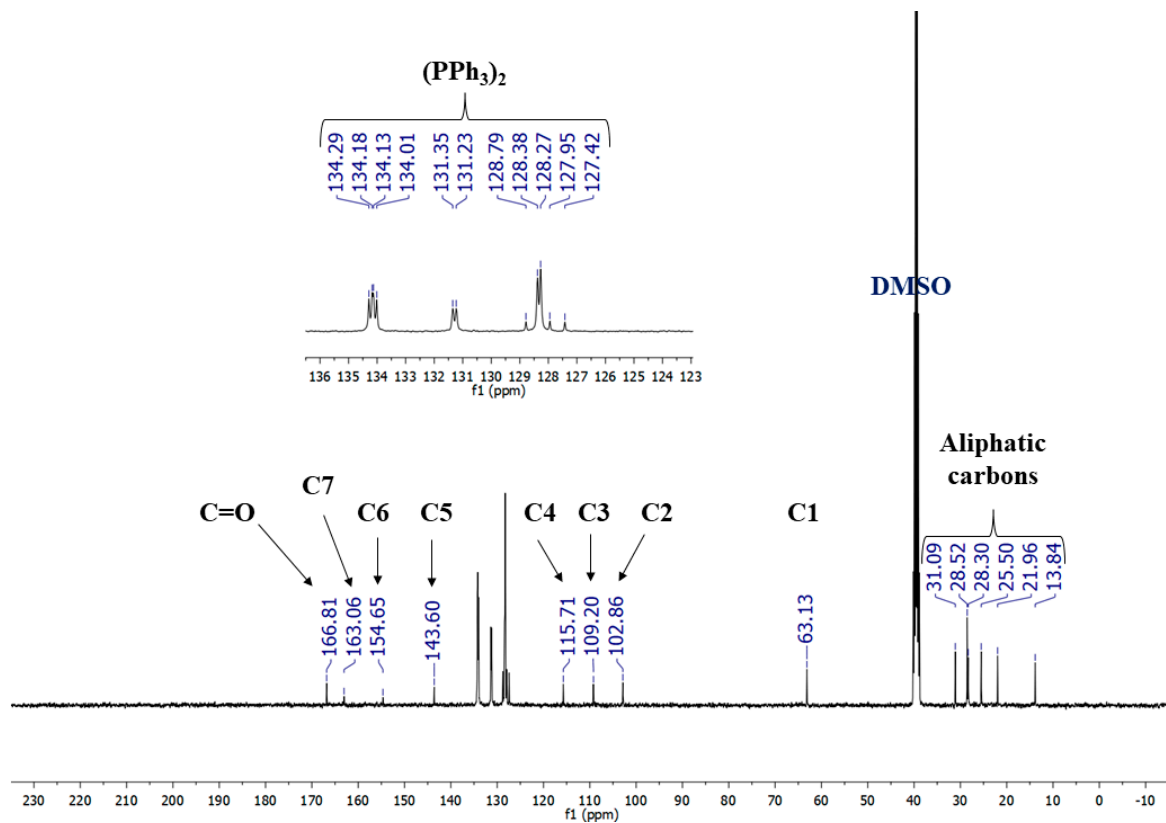

**Figure S11.**  $^{31}\text{P}\{^1\text{H}\}$  NMR spectrum of  $[\text{Pd}(\text{meg})(\text{PPh}_3)_2]$  **2**.

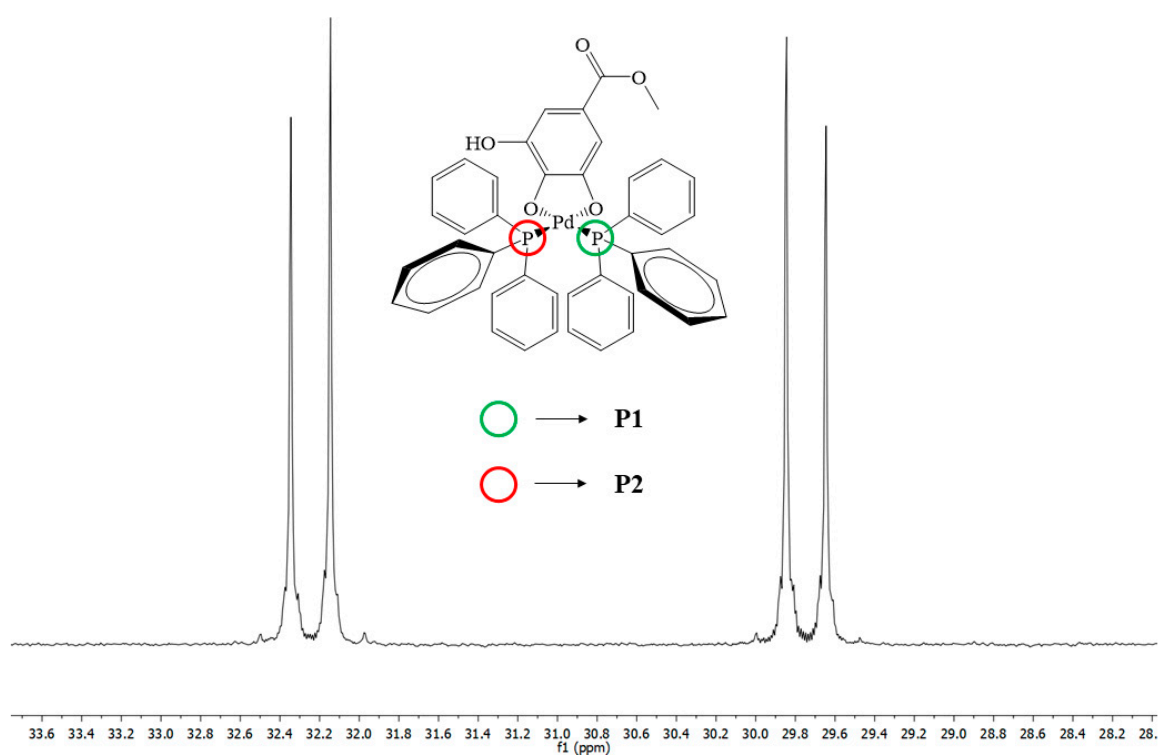

**Figure S12.**  $^{31}\text{P}\{^1\text{H}\}$  NMR spectrum of  $[\text{Pd}(\text{og})(\text{PPh}_3)_2]$  **4**.

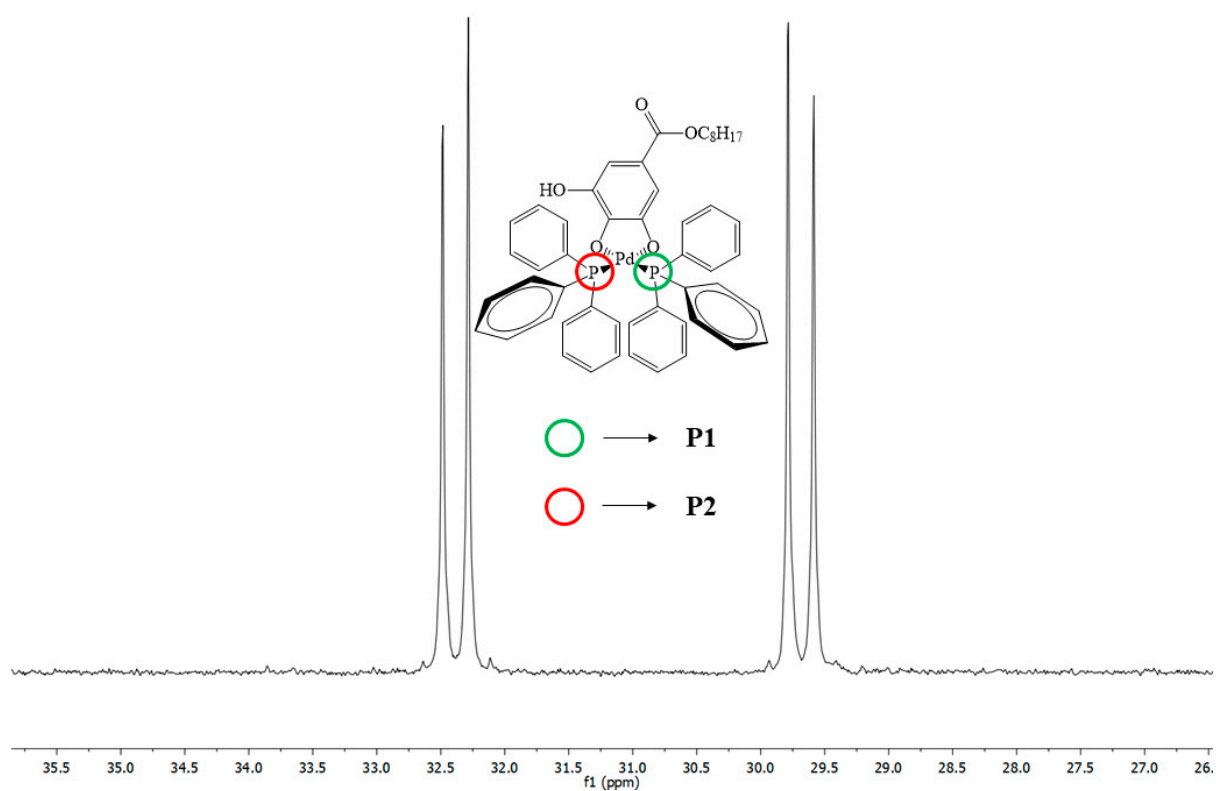

**Figure S13.** FTIR spectrum of  $[Pd(meg)(1,10-phen)] \cdot 2H_2O$  1.

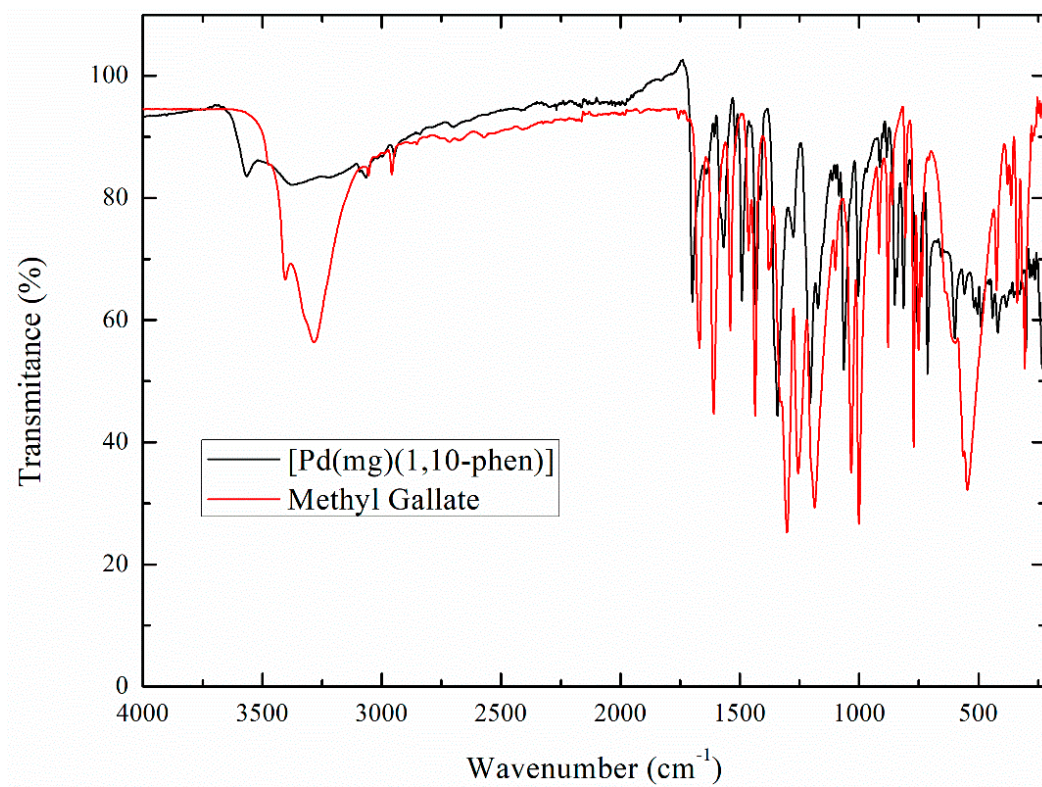

**Figure S14.** FTIR spectrum of [Pd(meg)(PPh<sub>3</sub>)<sub>2</sub>] **2**.



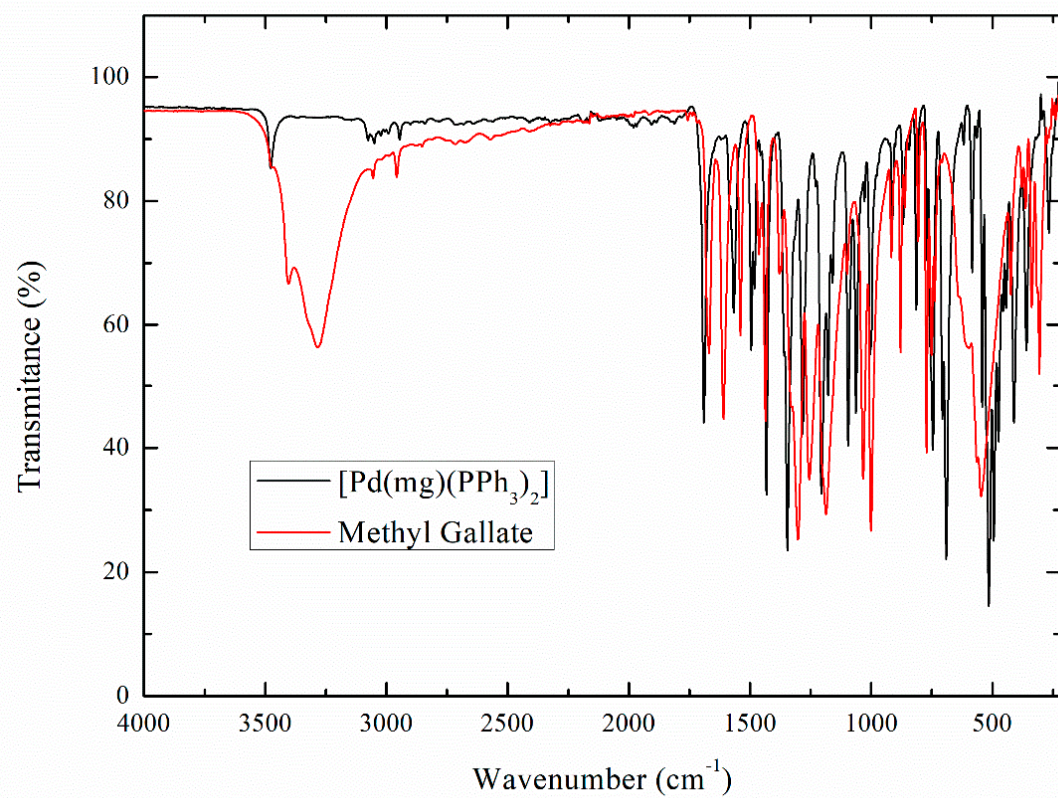

**Figure S15.** FTIR spectrum of  $[\text{Pd}(\text{og})(1,10\text{-phen})]\cdot 2.5\text{H}_2\text{O}$  **3**.

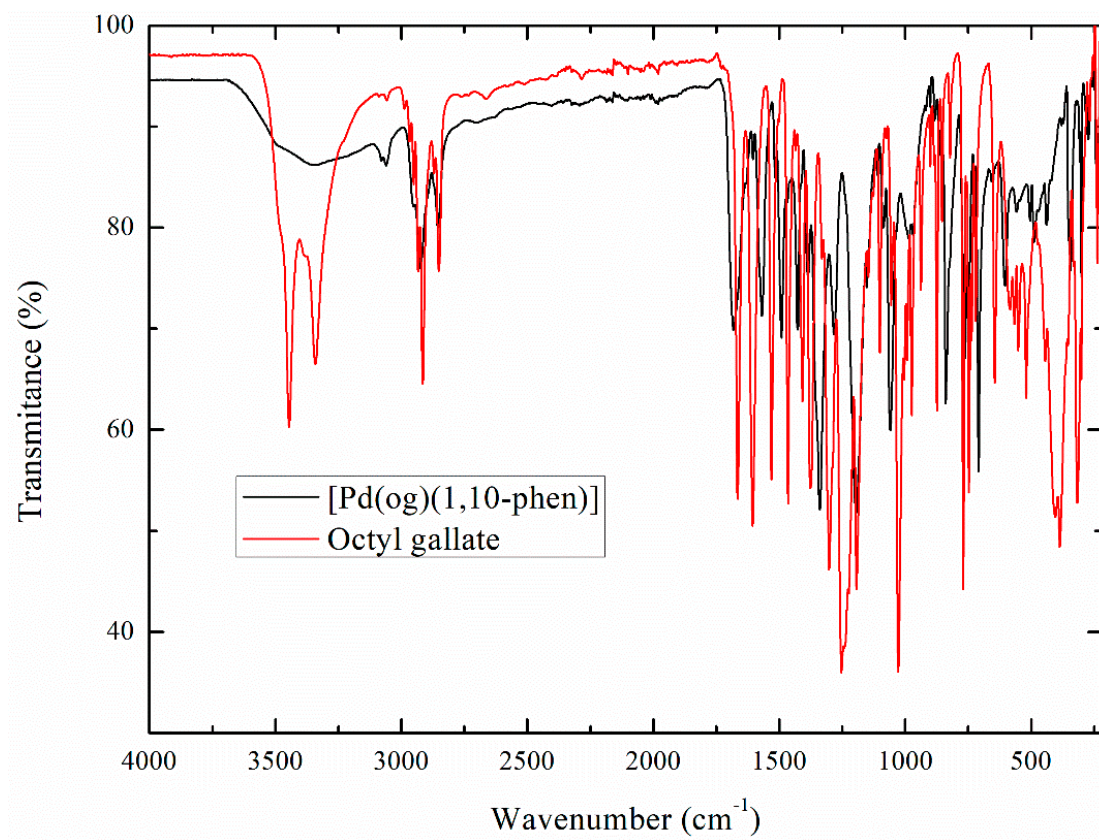

**Figure S16.** FTIR spectrum of  $[\text{Pd}(\text{og})(\text{PPh}_3)_2]$  **4**.

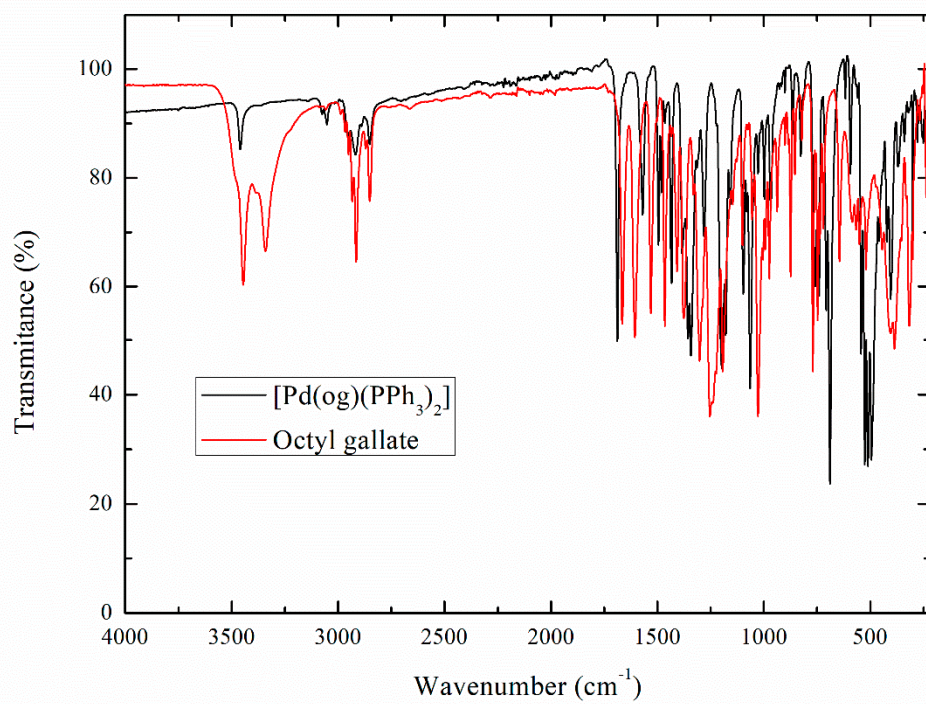

**Figure S17.** TGA/DTA curve of complex **1**.

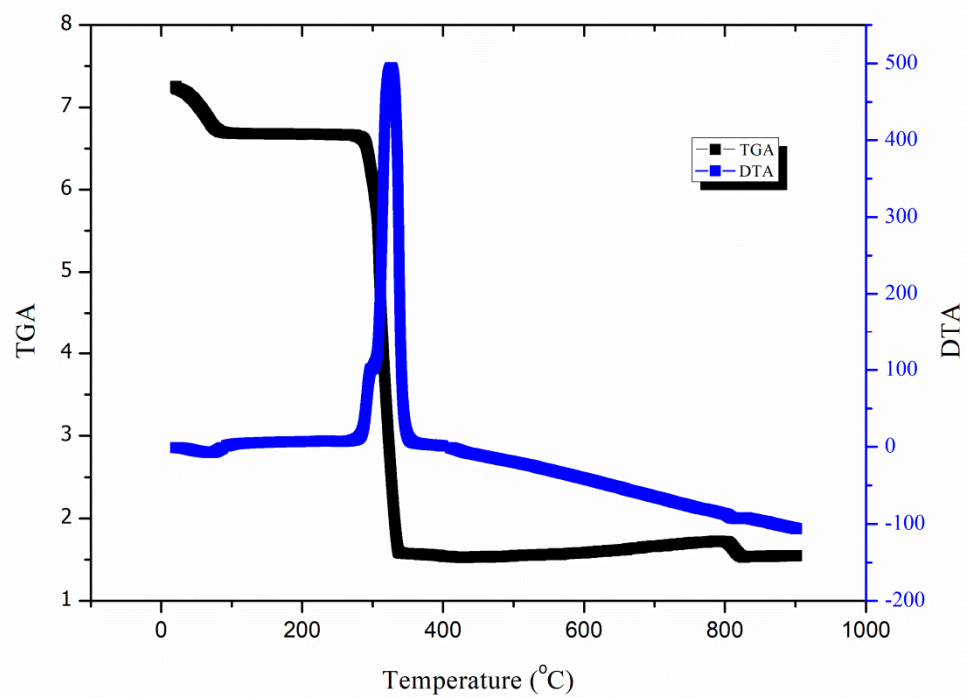

Supplement: s1 [file s1]
